# Supplementary material
Source: PubMed Central journal article supplement (PMC6754241)

SUPPLEMENTARY DATA

**Table S1 Tetramer sequences**

Tetramers were provided by the NIH tetramer core.

| <b>Tetramer target</b>      | <b>MHC molecule</b> | <b>Sequence</b> |
|-----------------------------|---------------------|-----------------|
| Mouse/human Insulin B 15-23 | H-2K(d)             | LYLVCGERG       |
| Mouse IGRP 206-214          | H-2K(d)             | VYLKTNVFL       |

SUPPLEMENTARY DATA

**Table S2 Islet donors for kidney capsule transplants**

Number of donors per age and gender for kidney capsule transplants

| <b>Strain</b>         | <b># of donors</b> | <b>Age</b> | <b>Gender</b> |
|-----------------------|--------------------|------------|---------------|
| <b>NOD</b>            | 1                  | 29 weeks   | Female        |
|                       | 1                  | 22 weeks   | Female        |
|                       | 2                  | 14 weeks   | Female        |
|                       | 2                  | 12 weeks   | Female        |
|                       | 1                  | 10 weeks   | Female        |
|                       | 1                  | 9 weeks    | Female        |
|                       | 3                  | 9 weeks    | Male          |
|                       | 1                  | 7 weeks    | Female        |
|                       | 1                  | 7 weeks    | Male          |
|                       | 3                  | 5 weeks    | Male          |
| <b>NOD Ins2-CCL21</b> | 2                  | 14 weeks   | Female        |
|                       | 3                  | 12 weeks   | Female        |
|                       | 1                  | 10 weeks   | Female        |
|                       | 4                  | 9 weeks    | Female        |
|                       | 2                  | 9 weeks    | Male          |
|                       | 4                  | 7 weeks    | Male          |
|                       | 3                  | 5 weeks    | Female        |
|                       | 1                  | 5 weeks    | Male          |

SUPPLEMENTARY DATA

**Table S3 Islet autoantigen gene expression in pancreatic FRC-like cells.**

Differential expression of T1D autoantigen genes between gp38<sup>dim</sup> FRC-like cells freshly sorted from either Ins2-CCL21 NOD mice or non-transgenic NOD littermates and processed for RNAseq calculated with the exact test implemented in edgeR. Linear Fold Change (linearFC) compares cells isolated from Ins2-CCL21 transgenic NOD mice over non-transgenic NOD littermates.

| <b>Upregulated</b>    |                  |                  |                           |                  |               |            |
|-----------------------|------------------|------------------|---------------------------|------------------|---------------|------------|
| <i>Symbol</i>         | <i>Gene type</i> | <i>Gene name</i> | <i>location</i>           | <i>Linear FC</i> | <i>Pvalue</i> | <i>FDR</i> |
| ENSMUSG00000037852.8  | Protein coding   | Cpe              | chr8:64592542-64693054    | <b>3.44</b>      | 5.63E-11      | 1.51E-08   |
| ENSMUSG00000029644.7  | Protein coding   | Pdx1             | chr5:147269959-147275848  | <b>3.51</b>      | 5.02E-06      | 2.68E-04   |
| ENSMUSG00000062995.12 | Protein coding   | Ica1             | chr6:8630527-8778488      | <b>3.83</b>      | 2.14E-12      | 9.55E-10   |
| ENSMUSG00000021194.6  | Protein coding   | Chga             | chr12:102554969-102565028 | <b>6.00</b>      | 8.96E-12      | 3.21E-09   |
| ENSMUSG00000017316.13 | Protein coding   | Ppy              | chr11:102099930-102101319 | <b>6.22</b>      | 7.33E-07      | 5.31E-05   |
| ENSMUSG00000041681.2  | Protein coding   | Iapp             | chr6:142298423-142303961  | <b>9.21</b>      | 1.38E-15      | 1.28E-12   |
| ENSMUSG00000022315.3  | Protein coding   | Slc30a8          | chr15:52295553-52335798   | <b>10.45</b>     | 3.19E-07      | 2.63E-05   |
| ENSMUSG00000000215.11 | Protein coding   | Ins2             | chr7:142678656-142743381  | <b>10.54</b>     | 3.80E-05      | 1.46E-03   |
| ENSMUSG00000056553.14 | Protein coding   | Ptprn2           | chr12:116485720-117276849 | <b>12.13</b>     | 2.92E-25      | 4.98E-22   |
| ENSMUSG00000026204.15 | Protein coding   | Ptprn            | chr1:75247027-75264502    | <b>14.50</b>     | 1.70E-13      | 1.08E-10   |
| ENSMUSG00000000394.15 | Protein coding   | Gcg              | chr2:62474530-62483650    | <b>16.02</b>     | 1.44E-25      | 2.61E-22   |
| ENSMUSG00000035804.4  | Protein coding   | Ins1             | chr19:52264323-52265456   | <b>16.20</b>     | 2.61E-08      | 3.16E-06   |
| ENSMUSG00000079516.2  | Protein coding   | Reg3a            | chr6:78380709-78383827    | <b>173.57</b>    | 3.27E-08      | 3.82E-06   |

SUPPLEMENTARY DATA

**Table S4 FRC genes**

Differential expression of FRC genes between gp38<sup>dim</sup> FRC-like cells freshly sorted from either Ins2-CCL21 NOD mice or non-transgenic NOD littermates and processed for RNAseq calculated with the exact test implemented in edgeR. Linear Fold Change (linearFC) compares cells isolated from Ins2-CCL21 transgenic NOD mice over non-transgenic NOD littermates.

| <b>Upregulated</b>    |                  |                  |                           |                  |               |            |
|-----------------------|------------------|------------------|---------------------------|------------------|---------------|------------|
| <i>Symbol</i>         | <i>Gene type</i> | <i>Gene name</i> | <i>location</i>           | <i>Linear FC</i> | <i>Pvalue</i> | <i>FDR</i> |
| ENSMUSG00000056978.8  | Protein coding   | Hamp2            | chr7:30922372-30924681    | <b>31.89</b>     | 6.89E-04      | 1.61E-02   |
| ENSMUSG00000019874.11 | Protein coding   | Fabp7            | chr10:57784881-57788450   | <b>10.46</b>     | 1.61E-04      | 4.88E-03   |
| ENSMUSG00000024331.11 | Protein coding   | Dsc2             | chr18:20030633-20059554   | <b>3.99</b>      | 1.30E-07      | 1.24E-05   |
| ENSMUSG00000026321.7  | Protein coding   | Tnfrsf11a        | chr1:105780718-105847981  | <b>3.28</b>      | 1.85E-05      | 7.90E-04   |
| ENSMUSG00000037605.16 | Protein coding   | Adgrl3           | chr5:81020138-81825133    | <b>3.26</b>      | 1.81E-06      | 1.13E-04   |
| ENSMUSG00000000567.5  | Protein coding   | Sox9             | chr11:112782224-112787760 | <b>3.21</b>      | 2.21E-08      | 2.75E-06   |
| ENSMUSG00000024621.15 | Protein coding   | Csf1r            | chr18:61105572-61132149   | <b>2.79</b>      | 6.65E-10      | 1.28E-07   |
| ENSMUSG00000032135.15 | Protein coding   | Mcaml            | chr9:44134469-44142727    | <b>2.46</b>      | 4.91E-06      | 2.63E-04   |
| ENSMUSG00000003545.3  | Protein coding   | Fosb             | chr7:19302696-19310051    | <b>2.27</b>      | 7.14E-06      | 3.55E-04   |
| ENSMUSG00000041559.7  | Protein coding   | Fmod             | chr1:134037254-134048277  | <b>1.77</b>      | 1.36E-05      | 6.14E-04   |

| <b>Downregulated</b>  |                  |                  |                           |                  |               |            |
|-----------------------|------------------|------------------|---------------------------|------------------|---------------|------------|
| <i>Symbol</i>         | <i>Gene type</i> | <i>Gene name</i> | <i>location</i>           | <i>Linear FC</i> | <i>Pvalue</i> | <i>FDR</i> |
| ENSMUSG00000029417.9  | Protein coding   | Cxcl9            | chr5:92321347-92328079    | <b>-5.56</b>     | 1.77E-24      | 2.75E-21   |
| ENSMUSG00000036594.14 | Protein coding   | H2-Aa            | chr17:34282744-34287827   | <b>-3.92</b>     | 1.59E-08      | 2.08E-06   |
| ENSMUSG00000079363.7  | Protein coding   | Gbp4             | chr5:105115767-105139586  | <b>-3.71</b>     | 9.10E-06      | 4.36E-04   |
| ENSMUSG00000003477.5  | Protein coding   | Inmt             | chr6:55170626-55175043    | <b>-3.13</b>     | 1.27E-06      | 8.37E-05   |
| ENSMUSG00000073421.5  | Protein coding   | H2-Ab1           | chr17:34263209-34269418   | <b>-3.05</b>     | 1.36E-07      | 1.28E-05   |
| ENSMUSG00000060586.10 | Protein coding   | H2-Eb1           | chr17:34305877-34316199   | <b>-2.63</b>     | 9.90E-07      | 6.87E-05   |
| ENSMUSG00000023046.6  | Protein coding   | Igfbp6           | chr15:102144362-102149511 | <b>-2.48</b>     | 7.24E-05      | 2.54E-03   |
| ENSMUSG00000020427.11 | Protein coding   | Igfbp3           | chr11:7206086-7213923     | <b>-2.30</b>     | 3.22E-09      | 4.99E-07   |
| ENSMUSG00000105504.4  | Protein coding   | Gbp5             | chr3:142493978-142522344  | <b>-2.20</b>     | 3.56E-05      | 1.38E-03   |
| ENSMUSG00000030116.14 | Protein coding   | Mfap5            | chr6:122505845-122529290  | <b>-2.04</b>     | 1.26E-04      | 3.95E-03   |
| ENSMUSG00000020101.14 | Protein coding   | Vsir             | chr10:60346851-60372684   | <b>-2.01</b>     | 1.23E-05      | 5.59E-04   |
| ENSMUSG00000031750.15 | Protein coding   | Il34             | chr8:110741829-110805924  | <b>-1.97</b>     | 1.59E-05      | 6.96E-04   |
| ENSMUSG00000024620.11 | Protein coding   | Pdgrfb           | chr18:61045150-61085061   | <b>-1.91</b>     | 1.01E-06      | 6.97E-05   |
| ENSMUSG00000035678.8  | Protein coding   | Tnfrsf9          | chr17:57105325-57107757   | <b>-1.91</b>     | 2.65E-05      | 1.08E-03   |

SUPPLEMENTARY DATA

|                       |                |          |                          |              |          |          |
|-----------------------|----------------|----------|--------------------------|--------------|----------|----------|
| ENSMUSG00000031497.9  | Protein coding | Tnfsf13b | chr8:10006467-10039072   | <b>-1.88</b> | 8.50E-08 | 8.75E-06 |
| ENSMUSG00000016496.7  | Protein coding | Cd274    | chr19:29367455-29388095  | <b>-1.82</b> | 8.90E-05 | 2.99E-03 |
| ENSMUSG00000028583.14 | Protein coding | Pdpm     | chr4:143267431-143299564 | <b>-1.80</b> | 8.95E-05 | 3.00E-03 |
| ENSMUSG00000017493.12 | Protein coding | Igfbp4   | chr11:99041244-99054392  | <b>-1.72</b> | 6.87E-04 | 1.60E-02 |
| ENSMUSG00000042333.16 | Protein coding | Tnfrsf14 | chr4:154921933-154928563 | <b>-1.71</b> | 1.45E-05 | 6.45E-04 |
| ENSMUSG00000029231.15 | Protein coding | Pdgfra   | chr5:75152292-75198215   | <b>-1.66</b> | 4.15E-05 | 1.57E-03 |
| ENSMUSG00000016494.9  | Protein coding | Cd34     | chr1:194938819-194961279 | <b>-1.65</b> | 8.25E-04 | 1.86E-02 |
| ENSMUSG00000024610.14 | Protein coding | Cd74     | chr18:60803848-60812646  | <b>-1.62</b> | 1.41E-03 | 2.84E-02 |
| ENSMUSG00000022425.16 | Protein coding | Enpp2    | chr15:54838901-54952892  | <b>-1.58</b> | 1.99E-04 | 5.79E-03 |
| ENSMUSG00000054675.5  | Protein coding | Tmem119  | chr5:113793729-113800516 | <b>-1.55</b> | 1.70E-03 | 3.28E-02 |
| ENSMUSG00000019899.16 | Protein coding | Lama2    | chr10:26980036-27619758  | <b>-1.49</b> | 2.24E-03 | 4.07E-02 |

SUPPLEMENTARY DATA

**Table S5. Contractome genes**

Differential expression of genes involved in controlling cell contractility and cytoskeleton structure and dynamic between gp38<sup>dim</sup> FRC-like cells freshly sorted from either Ins2-CCL21 NOD mice or non-transgenic NOD littermates and processed for RNAseq calculated with the exact test implemented in edgeR. Linear Fold Change (linearFC) compares cells isolated from Ins2-CCL21 transgenic NOD mice over non-transgenic NOD littermates.

| Upregulated           |                  |                  |                           |                  |               |            |
|-----------------------|------------------|------------------|---------------------------|------------------|---------------|------------|
| <i>Symbol</i>         | <i>Gene type</i> | <i>Gene name</i> | <i>location</i>           | <i>linear FC</i> | <i>Pvalue</i> | <i>FDR</i> |
| ENSMUSG00000038167.6  | Protein coding   | Plekhg6          | chr6:125362660-125380793  | <b>4.93</b>      | 4.50E-06      | 2.43E-04   |
| ENSMUSG00000074923.10 | Protein coding   | Pak6             | chr2:118663303-118698020  | <b>4.21</b>      | 7.36E-09      | 1.04E-06   |
| ENSMUSG00000021108.18 | Protein coding   | Prkch            | chr12:73584796-73778185   | <b>4.17</b>      | 1.56E-11      | 5.17E-09   |
| ENSMUSG00000031284.16 | Protein coding   | Pak3             | chrX:143518591-143797796  | <b>4.04</b>      | 2.11E-08      | 2.64E-06   |
| ENSMUSG00000047281.3  | Protein coding   | Sfn              | chr4:133600556-133602168  | <b>3.97</b>      | 7.89E-09      | 1.10E-06   |
| ENSMUSG00000030739.18 | Protein coding   | Myh14            | chr7:44605803-44670843    | <b>3.66</b>      | 1.42E-09      | 2.46E-07   |
| ENSMUSG00000020782.18 | Protein coding   | Llg12            | chr11:115824049-115855780 | <b>3.55</b>      | 9.21E-11      | 2.31E-08   |
| ENSMUSG00000029381.16 | Protein coding   | Shroom3          | chr5:92683435-92965318    | <b>3.37</b>      | 2.61E-07      | 2.24E-05   |
| ENSMUSG00000045180.13 | Protein coding   | Shroom2          | chrX:152609509-152769465  | <b>3.34</b>      | 2.86E-08      | 3.43E-06   |
| ENSMUSG00000044641.7  | Protein coding   | Pard6b           | chr2:168081004-168101203  | <b>3.11</b>      | 4.58E-07      | 3.55E-05   |
| ENSMUSG00000035873.8  | Protein coding   | Pawr             | chr10:108332121-108414240 | <b>3.00</b>      | 3.87E-07      | 3.09E-05   |
| ENSMUSG00000018387.12 | Protein coding   | Shroom1          | chr11:53457205-53467766   | <b>2.77</b>      | 3.52E-06      | 1.98E-04   |
| ENSMUSG00000029053.16 | Protein coding   | Prkcz            | chr4:155260129-155361361  | <b>2.31</b>      | 1.85E-06      | 1.15E-04   |
| ENSMUSG00000028518.8  | Protein coding   | Prkaa2           | chr4:105029874-105109890  | <b>2.13</b>      | 2.91E-04      | 7.86E-03   |
| ENSMUSG00000035133.9  | Protein coding   | Arhgap5          | chr12:52503972-52571975   | <b>2.02</b>      | 1.42E-03      | 2.87E-02   |
| ENSMUSG00000024769.7  | Protein coding   | Cdc42bpg         | chr19:6306456-6325652     | <b>1.90</b>      | 7.90E-05      | 2.72E-03   |
| ENSMUSG00000006494.11 | Protein coding   | Pdk1             | chr2:71873224-71903858    | <b>1.89</b>      | 2.75E-07      | 2.33E-05   |
| ENSMUSG00000039031.16 | Protein coding   | Arhgap18         | chr10:26753421-26918648   | <b>1.85</b>      | 1.76E-04      | 5.26E-03   |
| ENSMUSG0000003534.17  | Protein coding   | Ddr1             | chr17:35681567-35704621   | <b>1.70</b>      | 4.75E-06      | 2.55E-04   |
| ENSMUSG00000030774.13 | Protein coding   | Pak1             | chr7:97788541-97912381    | <b>1.61</b>      | 1.05E-04      | 3.42E-03   |
| ENSMUSG00000015143.15 | Protein coding   | Actn1            | chr12:80167547-80260371   | <b>1.51</b>      | 2.10E-03      | 3.86E-02   |
| ENSMUSG00000030602.13 | Protein coding   | Pak4             | chr7:28558819-28598185    | <b>1.45</b>      | 8.15E-04      | 1.84E-02   |

  

| Downregulated |                  |                  |                 |                  |               |            |
|---------------|------------------|------------------|-----------------|------------------|---------------|------------|
| <i>Symbol</i> | <i>Gene type</i> | <i>Gene name</i> | <i>location</i> | <i>linear FC</i> | <i>Pvalue</i> | <i>FDR</i> |

SUPPLEMENTARY DATA

|                        |                |        |                          |              |          |          |
|------------------------|----------------|--------|--------------------------|--------------|----------|----------|
| ENSMUSG00000006457.3   | Protein coding | Actn3  | chr19:4861223-4877909    | <b>-2.80</b> | 2.66E-07 | 2.27E-05 |
| ENSMUSG000000056367.14 | Protein coding | Actr3b | chr5:25759997-25850688   | <b>-1.87</b> | 1.69E-03 | 3.27E-02 |
| ENSMUSG00000002233.13  | Protein coding | Rhoc   | chr3:104788375-104794459 | <b>-1.87</b> | 1.16E-04 | 3.70E-03 |
| ENSMUSG000000029581.14 | Protein coding | Fscn1  | chr5:142960343-142973185 | <b>-1.79</b> | 3.86E-05 | 1.48E-03 |
| ENSMUSG000000029674.13 | Protein coding | Limk1  | chr5:134656039-134688598 | <b>-1.76</b> | 1.10E-04 | 3.55E-03 |
| ENSMUSG000000030409.15 | Protein coding | Dmpk   | chr7:19083849-19093821   | <b>-1.71</b> | 2.18E-05 | 9.10E-04 |
| ENSMUSG000000023972.10 | Protein coding | Ptk7   | chr17:46564471-46629504  | <b>-1.68</b> | 2.38E-04 | 6.67E-03 |
| ENSMUSG000000019370.10 | Protein coding | Calm3  | chr7:16915379-16924114   | <b>-1.54</b> | 2.52E-03 | 4.45E-02 |
| ENSMUSG000000029465.14 | Protein coding | Arcp3  | chr5:122391878-122414184 | <b>-1.51</b> | 2.62E-03 | 4.59E-02 |
| ENSMUSG000000005469.10 | Protein coding | Prkaca | chr8:83972993-83996443   | <b>-1.51</b> | 1.98E-03 | 3.70E-02 |
| ENSMUSG000000004665.10 | Protein coding | Cnn2   | chr10:79988584-79996062  | <b>-1.48</b> | 2.27E-03 | 4.12E-02 |
| ENSMUSG000000051391.9  | Protein coding | Ywhag  | chr5:135908409-135934616 | <b>-1.46</b> | 2.22E-03 | 4.05E-02 |
| ENSMUSG000000029621.14 | Protein coding | Arcp1a | chr5:145083830-145108761 | <b>-1.45</b> | 2.16E-03 | 3.96E-02 |
| ENSMUSG000000029622.16 | Protein coding | Arcp1b | chr5:145114215-145130705 | <b>-1.44</b> | 2.52E-03 | 4.46E-02 |

SUPPLEMENTARY DATA

**Table S6. Immunology genes**

Differential expression of immunoregulatory genes (NS\_IMMUNOLOGY\_MM\_C2269 panel taken from the Nanostring website) between gp38<sup>dim</sup> FRC-like cells freshly sorted from either Ins2-CCL21 NOD mice or non-transgenic NOD littermates and processed for RNAseq calculated with the exact test implemented in edgeR. Linear Fold Change (linearFC) compares cells isolated from Ins2-CCL21 transgenic NOD mice over non-transgenic NOD littermates.

| <b>Upregulated</b>    |                  |                  |                          |                  |               |            |
|-----------------------|------------------|------------------|--------------------------|------------------|---------------|------------|
| <i>Symbol</i>         | <i>Gene type</i> | <i>Gene name</i> | <i>location</i>          | <i>Linear FC</i> | <i>Pvalue</i> | <i>FDR</i> |
| ENSMUSG00000029656.13 | Protein coding   | C8b              | chr4:104766317-104804548 | <b>30.77</b>     | 6.21E-04      | 1.48E-02   |
| ENSMUSG00000026415.11 | Protein coding   | Fcamr            | chr1:130800902-130814740 | <b>28.59</b>     | 7.16E-04      | 1.66E-02   |
| ENSMUSG00000074272.10 | Protein coding   | Ceacam1          | chr7:25461707-25477603   | <b>7.01</b>      | 6.89E-05      | 2.43E-03   |
| ENSMUSG00000000489.7  | Protein coding   | Pdgfb            | chr15:79995874-80014977  | <b>5.22</b>      | 3.44E-08      | 3.96E-06   |
| ENSMUSG00000027111.15 | Protein coding   | Itga6            | chr2:71745616-71858416   | <b>4.42</b>      | 8.09E-09      | 1.13E-06   |
| ENSMUSG00000061132.13 | Protein coding   | Blnk             | chr19:40928927-40994535  | <b>3.72</b>      | 2.67E-10      | 5.77E-08   |
| ENSMUSG00000042784.9  | Protein coding   | Muc1             | chr3:89229057-89233381   | <b>3.67</b>      | 4.20E-10      | 8.54E-08   |
| ENSMUSG00000005672.12 | Protein coding   | Kit              | chr5:75574916-75656722   | <b>3.67</b>      | 3.65E-08      | 4.16E-06   |
| ENSMUSG00000000409.14 | Protein coding   | Lck              | chr4:129548344-129573641 | <b>3.63</b>      | 2.84E-05      | 1.14E-03   |
| ENSMUSG00000047139.9  | Protein coding   | Cd24a            | chr10:43578284-43584265  | <b>3.59</b>      | 1.29E-10      | 3.09E-08   |
| ENSMUSG00000015966.17 | Protein coding   | Il17rb           | chr14:29996135-30008896  | <b>3.58</b>      | 2.98E-04      | 8.00E-03   |
| ENSMUSG00000043088.16 | Protein coding   | Il17re           | chr6:113458484-113470758 | <b>3.48</b>      | 3.11E-12      | 1.32E-09   |
| ENSMUSG00000049176.14 | Protein coding   | Frmpd4           | chrX:167471309-168577231 | <b>3.36</b>      | 1.66E-03      | 3.22E-02   |
| ENSMUSG00000027544.16 | Protein coding   | Nfatc2           | chr2:168476410-168601657 | <b>3.35</b>      | 8.77E-05      | 2.95E-03   |
| ENSMUSG00000026070.15 | Protein coding   | Il18r1           | chr1:40465552-40500854   | <b>3.31</b>      | 1.14E-05      | 5.28E-04   |
| ENSMUSG00000026321.7  | Protein coding   | Tnfrsf11a        | chr1:105780718-105847981 | <b>3.28</b>      | 1.85E-05      | 7.90E-04   |
| ENSMUSG00000026981.15 | Protein coding   | Il1rn            | chr2:24336853-24351494   | <b>3.24</b>      | 1.75E-06      | 1.10E-04   |
| ENSMUSG00000022037.15 | Protein coding   | Clu              | chr14:65968483-65981547  | <b>3.22</b>      | 2.55E-11      | 7.66E-09   |
| ENSMUSG00000025494.8  | Protein coding   | Sigirr           | chr7:141091175-141100572 | <b>3.16</b>      | 2.47E-12      | 1.09E-09   |
| ENSMUSG00000024401.14 | Protein coding   | Tnf              | chr17:35199381-35202007  | <b>3.13</b>      | 2.25E-07      | 1.96E-05   |
| ENSMUSG00000028150.14 | Protein coding   | Rorc             | chr3:94372794-94398276   | <b>3.11</b>      | 8.25E-05      | 2.83E-03   |
| ENSMUSG00000022797.16 | Protein coding   | Tfrc             | chr16:32608920-32632794  | <b>2.89</b>      | 4.09E-06      | 2.25E-04   |
| ENSMUSG00000024621.15 | Protein coding   | Csf1r            | chr18:61105572-61132149  | <b>2.79</b>      | 6.65E-10      | 1.28E-07   |
| ENSMUSG00000004266.15 | Protein coding   | Ptpn6            | chr6:124720707-124738714 | <b>2.77</b>      | 1.85E-07      | 1.67E-05   |
| ENSMUSG00000058952.12 | Protein coding   | Cfi              | chr3:129835884-129875332 | <b>2.76</b>      | 1.64E-07      | 1.50E-05   |
| ENSMUSG00000026417.13 | Protein coding   | Pigr             | chr1:130826684-130852249 | <b>2.71</b>      | 4.10E-05      | 1.56E-03   |



SUPPLEMENTARY DATA

|                       |                |          |                          |             |          |          |
|-----------------------|----------------|----------|--------------------------|-------------|----------|----------|
| ENSMUSG00000024399.5  | Protein coding | Ltb      | chr17:35194439-35196320  | <b>2.60</b> | 9.30E-05 | 3.09E-03 |
| ENSMUSG00000040584.8  | Protein coding | Abcb1a   | chr5:8660077-8748575     | <b>2.57</b> | 1.66E-05 | 7.20E-04 |
| ENSMUSG00000051439.6  | Protein coding | Cd14     | chr18:36725074-36726736  | <b>2.49</b> | 1.39E-12 | 6.61E-10 |
| ENSMUSG00000062939.11 | Protein coding | Stat4    | chr1:51987148-52107189   | <b>2.46</b> | 2.48E-05 | 1.01E-03 |
| ENSMUSG00000079164.8  | Protein coding | Tlr5     | chr1:182954788-182976044 | <b>2.44</b> | 5.52E-06 | 2.90E-04 |
| ENSMUSG00000041607.16 | Protein coding | Mbp      | chr18:82475146-82585637  | <b>2.40</b> | 1.83E-11 | 5.83E-09 |
| ENSMUSG00000079105.4  | Protein coding | C7       | chr15:4988762-5063740    | <b>2.10</b> | 1.20E-06 | 7.99E-05 |
| ENSMUSG00000027820.12 | Protein coding | Mme      | chr3:63241537-63386030   | <b>2.01</b> | 4.45E-04 | 1.12E-02 |
| ENSMUSG00000030560.17 | Protein coding | Ctsc     | chr7:88278085-88310888   | <b>1.98</b> | 4.77E-05 | 1.77E-03 |
| ENSMUSG00000024948.14 | Protein coding | Map4k2   | chr19:6341135-6355615    | <b>1.86</b> | 8.99E-05 | 3.01E-03 |
| ENSMUSG00000026923.15 | Protein coding | Notch1   | chr2:26457903-26516663   | <b>1.72</b> | 5.59E-05 | 2.03E-03 |
| ENSMUSG00000019850.11 | Protein coding | Tnfrsf25 | chr10:19000910-19015657  | <b>1.69</b> | 1.52E-05 | 6.72E-04 |
| ENSMUSG00000026029.14 | Protein coding | Casp8    | chr1:58795374-58847503   | <b>1.54</b> | 1.38E-03 | 2.80E-02 |
| ENSMUSG00000060477.14 | Protein coding | Irak2    | chr6:113638467-113695026 | <b>1.53</b> | 3.69E-04 | 9.56E-03 |
| ENSMUSG00000046223.10 | Protein coding | Plaur    | chr7:24462484-24475968   | <b>1.49</b> | 2.48E-03 | 4.40E-02 |
| ENSMUSG00000006932.17 | Protein coding | Cttnb1   | chr9:120929216-120960507 | <b>1.43</b> | 2.52E-03 | 4.45E-02 |

| <b>Downregulated</b>  |                  |                  |                          |                  |               |            |
|-----------------------|------------------|------------------|--------------------------|------------------|---------------|------------|
| <i>Symbol</i>         | <i>Gene type</i> | <i>Gene name</i> | <i>location</i>          | <i>Linear FC</i> | <i>Pvalue</i> | <i>FDR</i> |
| ENSMUSG00000029417.9  | Protein coding   | Cxcl9            | chr5:92321347-92328079   | <b>-5.56</b>     | 1.77E-24      | 2.75E-21   |
| ENSMUSG00000026073.13 | Protein coding   | Il1r2            | chr1:40074079-40125231   | <b>-4.08</b>     | 1.33E-07      | 1.26E-05   |
| ENSMUSG00000036594.14 | Protein coding   | H2-Aa            | chr17:34282744-34287827  | <b>-3.92</b>     | 1.59E-08      | 2.08E-06   |
| ENSMUSG00000096727.2  | Protein coding   | Psmb9            | chr17:34181988-34187764  | <b>-3.57</b>     | 2.41E-10      | 5.31E-08   |
| ENSMUSG00000009185.2  | Protein coding   | Ccl8             | chr11:82115185-82116799  | <b>-3.42</b>     | 1.88E-04      | 5.53E-03   |
| ENSMUSG00000073421.5  | Protein coding   | H2-Ab1           | chr17:34263209-34269418  | <b>-3.05</b>     | 1.36E-07      | 1.28E-05   |
| ENSMUSG00000038037.5  | Protein coding   | Socs1            | chr16:10782240-10785536  | <b>-3.03</b>     | 1.70E-13      | 1.08E-10   |
| ENSMUSG00000061232.15 | Protein coding   | H2-K1            | chr17:33996017-34000333  | <b>-2.73</b>     | 1.59E-12      | 7.41E-10   |
| ENSMUSG00000067235.14 | Protein coding   | H2-Q10           | chr17:35470089-35474563  | <b>-2.68</b>     | 3.94E-10      | 8.19E-08   |
| ENSMUSG00000060586.10 | Protein coding   | H2-Eb1           | chr17:34305877-34316199  | <b>-2.63</b>     | 9.90E-07      | 6.87E-05   |
| ENSMUSG00000037321.17 | Protein coding   | Tap1             | chr17:34187553-34197225  | <b>-2.62</b>     | 2.23E-09      | 3.61E-07   |
| ENSMUSG00000031897.9  | Protein coding   | Psmb10           | chr8:105935735-105938444 | <b>-2.45</b>     | 7.19E-08      | 7.60E-06   |
| ENSMUSG00000021356.10 | Protein coding   | Irf4             | chr13:30749226-30766976  | <b>-2.44</b>     | 6.13E-06      | 3.17E-04   |
| ENSMUSG00000021822.3  | Protein coding   | Plau             | chr14:20836660-20843385  | <b>-2.41</b>     | 1.19E-09      | 2.12E-07   |

SUPPLEMENTARY DATA

|                       |                |          |                           |              |          |          |
|-----------------------|----------------|----------|---------------------------|--------------|----------|----------|
| ENSMUSG00000024164.15 | Protein coding | C3       | chr17:57203970-57228136   | <b>-2.36</b> | 2.97E-08 | 3.52E-06 |
| ENSMUSG00000025888.5  | Protein coding | Casp1    | chr9:5298517-5307265      | <b>-2.30</b> | 3.13E-05 | 1.24E-03 |
| ENSMUSG00000056749.7  | Protein coding | Nfil3    | chr13:52967209-52981073   | <b>-2.28</b> | 9.93E-08 | 9.81E-06 |
| ENSMUSG00000046718.8  | Protein coding | Bst2     | chr8:71534255-71537456    | <b>-2.27</b> | 6.15E-08 | 6.59E-06 |
| ENSMUSG00000026770.5  | Protein coding | Il2ra    | chr2:11642807-11693193    | <b>-2.25</b> | 3.15E-06 | 1.79E-04 |
| ENSMUSG00000056501.3  | Protein coding | Cebpb    | chr2:167688915-167690418  | <b>-2.23</b> | 2.65E-09 | 4.19E-07 |
| ENSMUSG00000025498.15 | Protein coding | Irf7     | chr7:141262706-141266481  | <b>-2.22</b> | 1.54E-07 | 1.43E-05 |
| ENSMUSG00000046879.7  | Protein coding | Irgm1    | chr11:48861968-48871683   | <b>-2.19</b> | 3.59E-10 | 7.48E-08 |
| ENSMUSG00000025491.14 | Protein coding | Ifitm1   | chr7:140967221-140969825  | <b>-2.19</b> | 5.13E-06 | 2.73E-04 |
| ENSMUSG00000003420.8  | Protein coding | Fcgrt    | chr7:45092990-45103851    | <b>-2.16</b> | 1.30E-05 | 5.90E-04 |
| ENSMUSG00000060802.8  | Protein coding | B2m      | chr2:122147686-122153083  | <b>-2.11</b> | 5.89E-09 | 8.46E-07 |
| ENSMUSG00000053113.3  | Protein coding | Socs3    | chr11:117966079-117970047 | <b>-2.03</b> | 1.43E-05 | 6.38E-04 |
| ENSMUSG00000006611.15 | Protein coding | Hfe      | chr13:23702034-23710854   | <b>-1.99</b> | 7.07E-06 | 3.53E-04 |
| ENSMUSG00000055172.10 | Protein coding | C1ra     | chr6:124512405-124523443  | <b>-1.94</b> | 1.67E-06 | 1.06E-04 |
| ENSMUSG00000024620.11 | Protein coding | Pdgrfb   | chr18:61045150-61085061   | <b>-1.91</b> | 1.01E-06 | 6.97E-05 |
| ENSMUSG00000028599.10 | Protein coding | Tnfrsf1b | chr4:145213463-145246870  | <b>-1.89</b> | 9.51E-08 | 9.53E-06 |
| ENSMUSG00000026104.14 | Protein coding | Stat1    | chr1:52119440-52161865    | <b>-1.88</b> | 8.84E-08 | 9.01E-06 |
| ENSMUSG00000031497.9  | Protein coding | Tnfsf13b | chr8:10006467-10039072    | <b>-1.88</b> | 8.50E-08 | 8.75E-06 |
| ENSMUSG00000016496.7  | Protein coding | Cd274    | chr19:29367455-29388095   | <b>-1.82</b> | 8.90E-05 | 2.99E-03 |
| ENSMUSG00000023067.14 | Protein coding | Cdkn1a   | chr17:29090976-29100727   | <b>-1.81</b> | 5.06E-06 | 2.69E-04 |
| ENSMUSG00000097328.7  | Protein coding | Tnfsf12  | chr11:69686250-69695849   | <b>-1.81</b> | 1.04E-04 | 3.39E-03 |
| ENSMUSG00000023224.12 | Protein coding | Serping1 | chr2:84765387-84775444    | <b>-1.81</b> | 1.24E-04 | 3.91E-03 |
| ENSMUSG00000033467.12 | Protein coding | Crlf2    | chr5:109554709-109558993  | <b>-1.80</b> | 6.11E-06 | 3.16E-04 |
| ENSMUSG00000026193.15 | Protein coding | Fn1      | chr1:71585520-71653200    | <b>-1.80</b> | 2.25E-04 | 6.36E-03 |
| ENSMUSG00000048120.16 | Protein coding | Entpd1   | chr19:40612366-40741602   | <b>-1.79</b> | 8.41E-05 | 2.87E-03 |
| ENSMUSG00000042190.12 | Protein coding | Cmklr1   | chr5:113612354-113650426  | <b>-1.78</b> | 2.79E-06 | 1.61E-04 |
| ENSMUSG00000027947.11 | Protein coding | Il6ra    | chr3:89864059-89913196    | <b>-1.77</b> | 5.14E-06 | 2.73E-04 |
| ENSMUSG00000024371.14 | Protein coding | C2       | chr17:34862604-34898265   | <b>-1.77</b> | 8.91E-05 | 2.99E-03 |
| ENSMUSG00000019843.14 | Protein coding | Fyn      | chr10:39368855-39565381   | <b>-1.76</b> | 3.70E-05 | 1.42E-03 |
| ENSMUSG00000027995.10 | Protein coding | Tlr2     | chr3:83836272-83841767    | <b>-1.75</b> | 1.12E-04 | 3.61E-03 |
| ENSMUSG00000053475.5  | Protein coding | Tnfaip6  | chr2:52038009-52056686    | <b>-1.75</b> | 1.81E-04 | 5.37E-03 |
| ENSMUSG00000032508.8  | Protein coding | Myd88    | chr9:119335934-119341411  | <b>-1.74</b> | 3.09E-05 | 1.23E-03 |

SUPPLEMENTARY DATA

|                       |                |          |                           |              |          |          |
|-----------------------|----------------|----------|---------------------------|--------------|----------|----------|
| ENSMUSG00000042333.16 | Protein coding | Tnfrsf14 | chr4:154921933-154928563  | <b>-1.71</b> | 1.45E-05 | 6.45E-04 |
| ENSMUSG00000036427.5  | Protein coding | Gpi1     | chr7:34201330-34230336    | <b>-1.70</b> | 1.72E-03 | 3.31E-02 |
| ENSMUSG00000024308.14 | Protein coding | Tapbp    | chr17:33915899-33929288   | <b>-1.70</b> | 7.86E-05 | 2.71E-03 |
| ENSMUSG00000032011.5  | Protein coding | Thy1     | chr9:44043384-44048579    | <b>-1.68</b> | 4.72E-04 | 1.17E-02 |
| ENSMUSG00000026637.13 | Protein coding | Traf5    | chr1:191997205-192092559  | <b>-1.67</b> | 8.71E-05 | 2.95E-03 |
| ENSMUSG00000016494.9  | Protein coding | Cd34     | chr1:194938819-194961279  | <b>-1.65</b> | 8.25E-04 | 1.86E-02 |
| ENSMUSG00000041515.10 | Protein coding | Irf8     | chr8:120736358-120756694  | <b>-1.64</b> | 1.60E-03 | 3.13E-02 |
| ENSMUSG0000000555.8   | Protein coding | Itga5    | chr15:103344286-103366763 | <b>-1.64</b> | 3.50E-04 | 9.14E-03 |
| ENSMUSG00000017344.4  | Protein coding | Vtn      | chr11:78499091-78502324   | <b>-1.63</b> | 1.86E-03 | 3.52E-02 |
| ENSMUSG00000035000.8  | Protein coding | Dpp4     | chr2:62330073-62412231    | <b>-1.63</b> | 9.83E-04 | 2.14E-02 |
| ENSMUSG00000014599.10 | Protein coding | Csf1     | chr3:107741048-107760469  | <b>-1.63</b> | 8.74E-05 | 2.95E-03 |
| ENSMUSG00000024610.14 | Protein coding | Cd74     | chr18:60803848-60812646   | <b>-1.62</b> | 1.41E-03 | 2.84E-02 |
| ENSMUSG00000040033.16 | Protein coding | Stat2    | chr10:128270559-128292849 | <b>-1.62</b> | 8.52E-05 | 2.90E-03 |
| ENSMUSG00000039377.7  | Protein coding | Hlx      | chr1:184727140-184732619  | <b>-1.61</b> | 1.81E-03 | 3.45E-02 |
| ENSMUSG00000020227.10 | Protein coding | Irak3    | chr10:120141648-120202130 | <b>-1.61</b> | 9.37E-05 | 3.11E-03 |
| ENSMUSG00000073889.10 | Protein coding | Il11ra1  | chr4:41699989-41769474    | <b>-1.61</b> | 1.49E-03 | 2.97E-02 |
| ENSMUSG00000020484.18 | Protein coding | Xbp1     | chr11:5520659-5525893     | <b>-1.60</b> | 7.24E-04 | 1.68E-02 |
| ENSMUSG0000002603.15  | Protein coding | Tgfb1    | chr7:25687002-25705077    | <b>-1.57</b> | 2.78E-03 | 4.81E-02 |
| ENSMUSG00000055435.6  | Protein coding | Maf      | chr8:115682942-115707794  | <b>-1.57</b> | 2.64E-03 | 4.61E-02 |
| ENSMUSG00000020919.11 | Protein coding | Stat5b   | chr11:100780731-100850724 | <b>-1.57</b> | 2.59E-04 | 7.12E-03 |
| ENSMUSG00000003873.11 | Protein coding | Bax      | chr7:45461697-45466898    | <b>-1.55</b> | 1.13E-03 | 2.38E-02 |
| ENSMUSG00000053175.17 | Protein coding | Bcl3     | chr7:19808462-19822770    | <b>-1.54</b> | 2.92E-04 | 7.89E-03 |
| ENSMUSG00000022971.18 | Protein coding | Ifnar2   | chr16:91372783-91405589   | <b>-1.51</b> | 4.36E-04 | 1.10E-02 |
| ENSMUSG00000070942.8  | Protein coding | Il1rl2   | chr1:40324610-40367562    | <b>-1.51</b> | 2.74E-03 | 4.76E-02 |
| ENSMUSG00000073489.6  | Protein coding | Ifi204   | chr1:173747293-173766943  | <b>-1.48</b> | 1.64E-03 | 3.19E-02 |
| ENSMUSG00000022965.8  | Protein coding | Ifngr2   | chr16:91547072-91565623   | <b>-1.46</b> | 2.51E-03 | 4.43E-02 |

## SUPPLEMENTARY DATA

**Figure S1.** (A) Quantification of T cell phenotypes in pancreatic infiltrates of 4 week-old non-transgenic littermate (n=5) and Ins2-CCL21 NOD (n=5) mice by flow cytometry. Data are indicated as % CD45<sup>+</sup> live cells. (B) Quantification of T cell phenotypes in blood of 4week-old non-transgenic (n=5) and Ins2-CCL21 NOD (n=5) mice by flow cytometry. Data are indicated as % CD45<sup>+</sup> live cells. (C) Quantification of T cell phenotypes in spleen of 4 week-old non-transgenic (n=5) and Ins2-CCL21 NOD (n=5) mice by flow cytometry. Data are indicated as total numbers of live cells. (D) Quantification of innate and antigen presenting cell phenotypes in pancreatic infiltrates of 4week-old non-transgenic (n=5) and Ins2-CCL21 NOD (n=5) mice by flow cytometry. Data are indicated as % CD45<sup>+</sup> live cells. \*\*\*, p<0.01. Statistically significant populations are underlined and highlighted by boxes.

T (T cells): CD3<sup>+</sup>; T<sub>regs</sub> (regulatory T cells): CD4<sup>+</sup> FoxP3<sup>+</sup> CD25<sup>hi</sup>; T<sub>n</sub> (naïve T cells): CD44<sup>-</sup> CD127<sup>-</sup> CD62L<sup>+</sup>; T<sub>ef</sub> (effector T cells): CD44<sup>+</sup> CD127<sup>-</sup>; T<sub>cm</sub> (central memory T cells): CD44<sup>+</sup> CD127<sup>+</sup> CD62L<sup>+</sup>; T<sub>efm</sub> (effector memory T cells): CD44<sup>+</sup> CD127<sup>+</sup> CD62L<sup>-</sup>; Macs (macrophages): CD11b<sup>+</sup> F4/80<sup>+</sup> B220<sup>-</sup>; Neutr (neutrophils): CD11b<sup>+</sup> GR-1<sup>+</sup>; Eos (eosinophils): CD11b<sup>+</sup> GR-1<sup>+</sup> F4/80<sup>+</sup>; B cells: CD11b<sup>-</sup> F4/80<sup>-</sup> B220<sup>+</sup>; mmDCs (mature myeloid dendritic cells): CD11b<sup>+</sup> CD11c<sup>+</sup> MHCII<sup>+</sup>; imDCs (immature myeloid dendritic cells): CD11b<sup>+</sup> CD11c<sup>+</sup> MHCII<sup>-</sup>; iLDCs (immature lymphoid dendritic cells): CD11b<sup>-</sup> CD11c<sup>+</sup> I MHCII<sup>-</sup>; mLDCs (mature lymphoid dendritic cells): CD11b<sup>-</sup> CD11c<sup>+</sup> I MHCII<sup>+</sup>.

SUPPLEMENTARY DATA

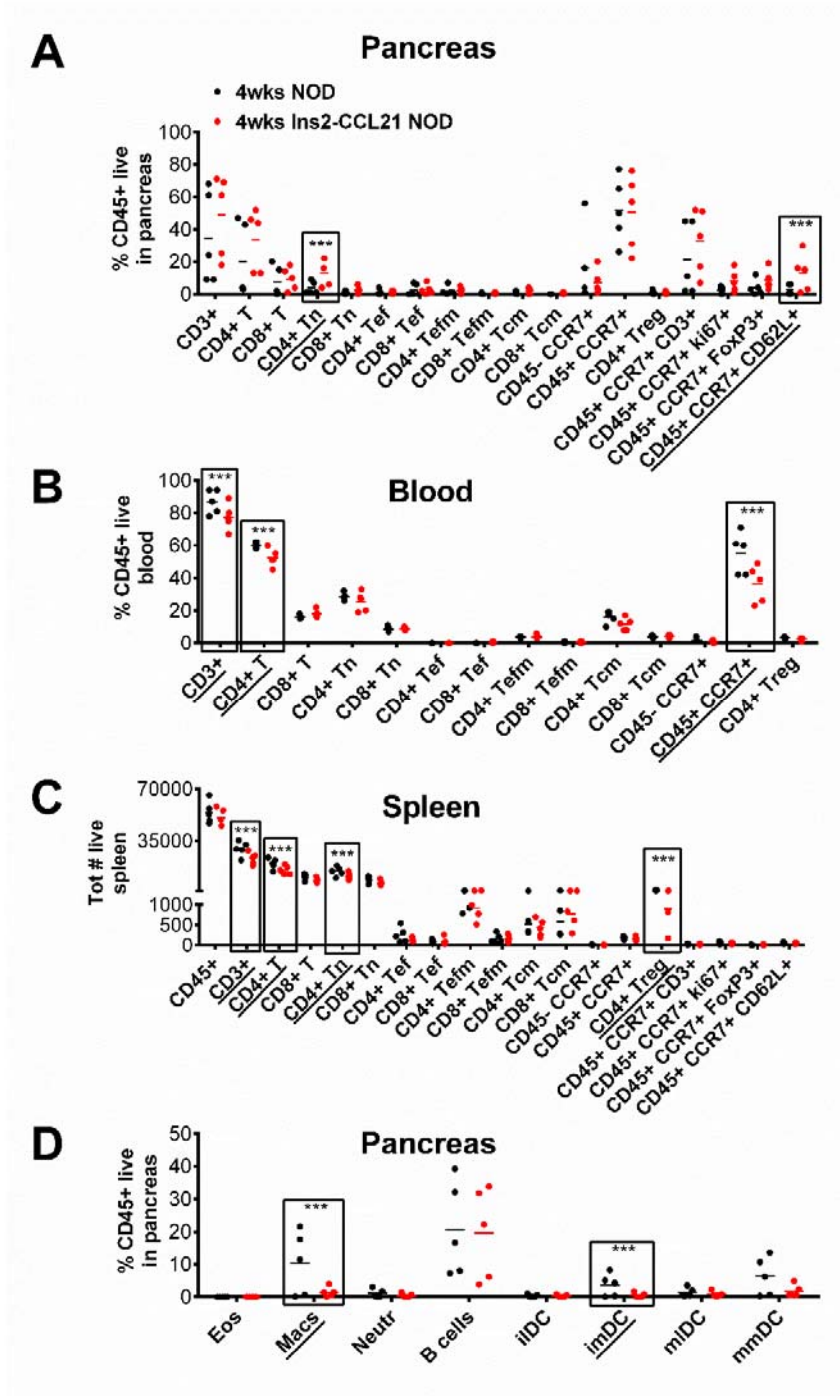

## SUPPLEMENTARY DATA

**Figure S2.** (A) Quantification of FRC ( $CD45^- gp38^+ CD31^-$ ) total number in lymph nodes (LNs) and of FRC-like cells in pancreatic islets of 4 week-old non-transgenic (n=4) and Ins2-CCL21 NOD mice (n=4) by flow cytometry. (B) Quantification of gp38 mean fluorescence intensity (MFI) of  $gp38^{dim} CD31^-$ ,  $gp38^{hi} CD31^-$ , and  $gp38^+ CD31^-$  FRCs-like cells from LNs and from islets of CCL21-transgenic NOD mice (red) and from non-transgenic NOD littermates. Also shown are quantification of gp38 mean fluorescence intensity of all  $gp38^+ CD31^-$  FRCs-like cells from LNs and from islets of CCL21-transgenic NOD mice (red) and from non-transgenic NOD littermates and MFI gp38 values of CCL21-transgenic NOD normalized to non-transgenic littermates. (C, D) Quantification of relative proportions of  $CD45^-$  lymphoid stromal cells (FRC:  $gp38^+ CD31^-$ ; LECs:  $gp38^+ CD31^+$ ; BECs:  $gp38^- CD31^+$ ; DN:  $gp38^- CD31^-$ ) from LNs of 4 week-old (C) and 12 week-old (D) non-transgenic (n=4) and Ins2-CCL21 NOD mice (n=4) by flow cytometry. (E) Percent of diabetes free chemically-diabetic BALB/c mice transplanted (EFP) with islets from fully MHC-mismatched CCL21<sup>+</sup> (red, n=13) transgenic or CCL21<sup>-</sup> (black, n=4) control B6 mice; \*\*\*, p<0.01; \*, p<0.05. (F, G) Comparison of morphology quantified by forward scatter (FSC-A) of  $CD45^- gp38^+ CD31^-$  FRC isolated from the LNs or of FRC-like cells from the pancreatic islets of 4 week-old (F) or from 12 week-old (G) non-transgenic (n=4) and Ins2-CCL21 NOD mice (n=4) by flow cytometry.

SUPPLEMENTARY DATA

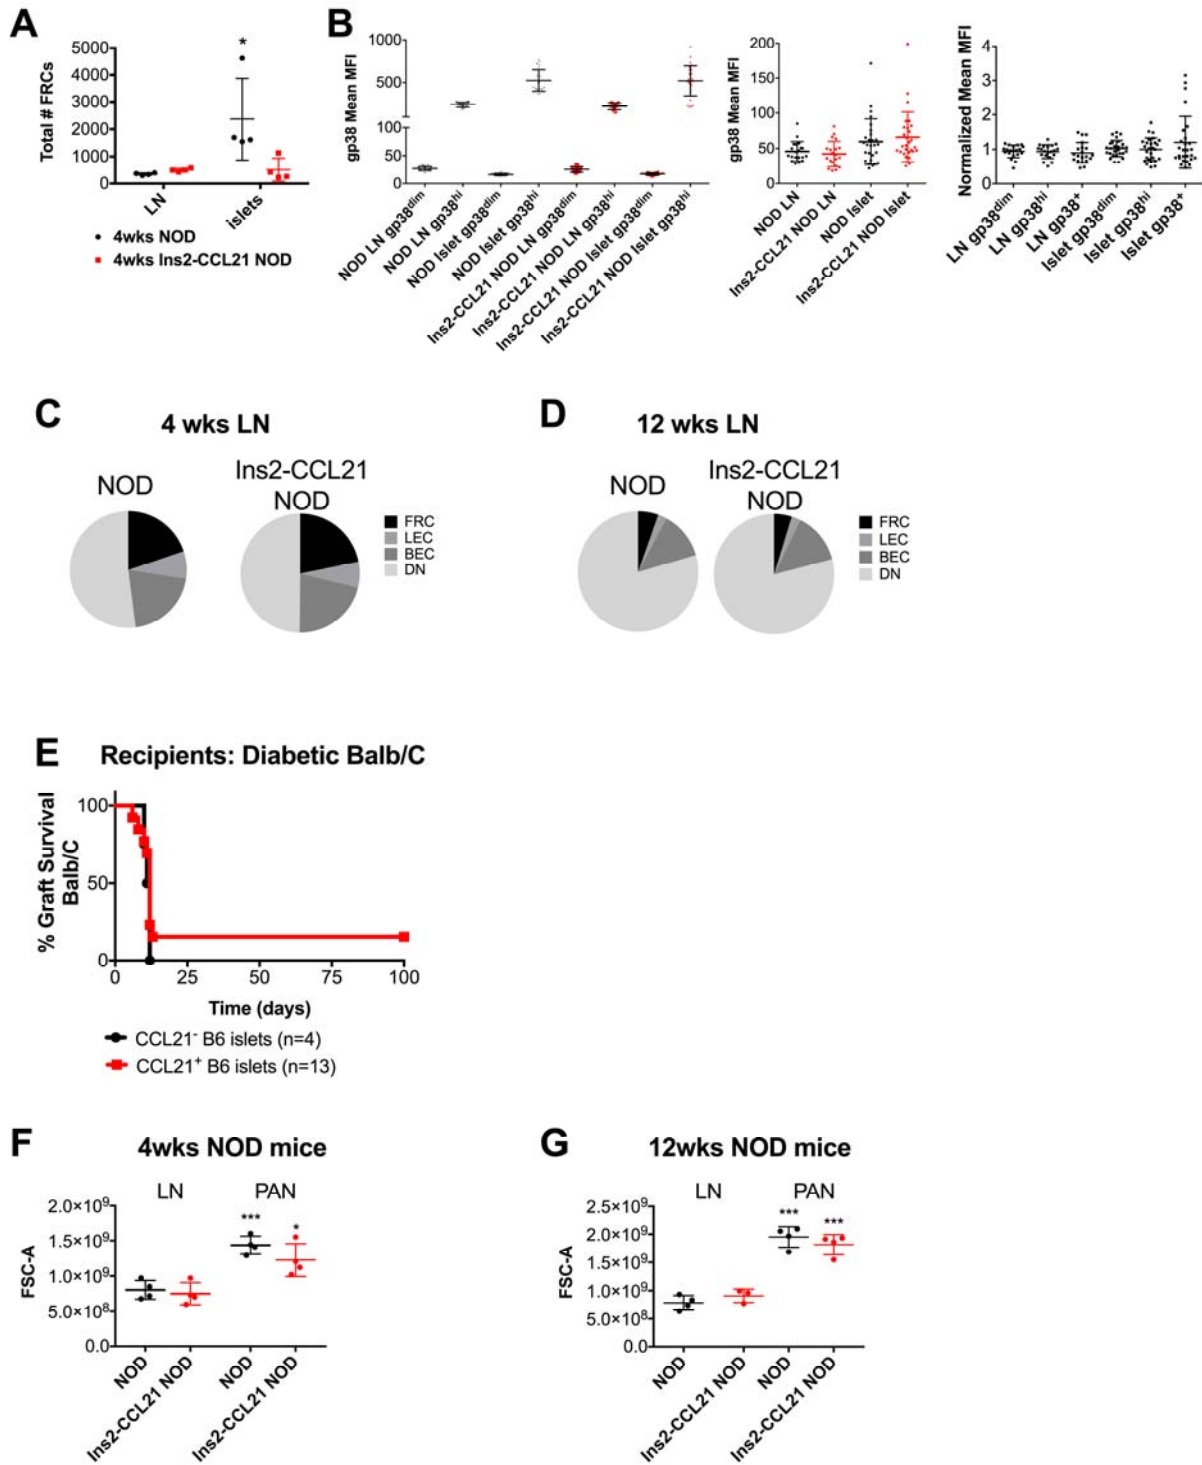

Supplement: DB190239SupplementaryData.pdf [file DB190239SupplementaryData.pdf]
